# Supplementary material
Source: PubMed Central journal article supplement (PMC6871566)
Supplement: ijpt-04-03-03_s01.pdf [file ijpt-04-03-03_s01.pdf]

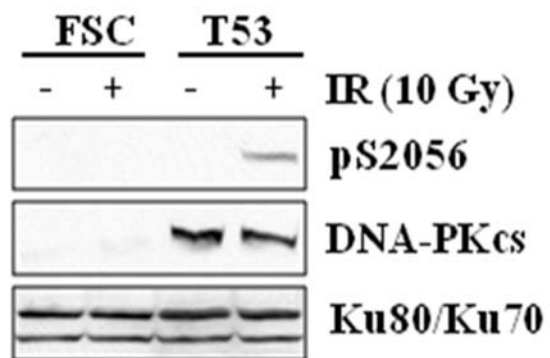

**Supplementary Figure 1.**

FSC1-3 and T53 cells were exposed to  $\gamma$ -ray (10 Gy) and harvested at 1 hour. Nuclear extracts were prepared and subjected to western blot analysis using anti-DNA-PKcs (clone 18-2), anti-phosphor-S2056, anti-Ku80 and anti-Ku70 antibodies.
